# Supplementary material
Source: PubMed Central journal article supplement (PMC2614901)
Supplement: NIHMS47053-supplement-Suppl_data.pdf [file NIHMS47053-supplement-Suppl_data.pdf]

**Supporting Information for:**

**A mechanism for Src kinase-dependent signaling by non-catalytic receptors**

**Jonathan A. Cooper<sup>†‡</sup> and Hong Qian<sup>\*‡</sup>**

<sup>†</sup> Division of Basic Sciences, Fred Hutchinson Cancer Research Center, Seattle, Washington 98109

<sup>\*</sup> Department of Applied Mathematics, University of Washington, Seattle, Washington 98195

**This file contains:**

**Table 2. Cellular concentrations and reaction rates for SFKs and SDRs**

**Appendix 1: Effect of positive and negative feedback on phosphorylation of monomeric receptor**

**Appendix 2: Trans-phosphorylation of receptor dimers, allowing for feedback**

**Appendix 3: The effect of SFK trans-phosphorylation, independent of receptor trans-phosphorylation**

**Figure S1**

**Figure S2**

**Three Excel spreadsheets are available as separate files.**

**Table 2. Cellular concentrations and reaction rates for SFKs and SDRs**

| Parameter | Description                                           | Value                                                           | Explanation                                                                                                                                                                                 | Citation <sup>a</sup>   |
|-----------|-------------------------------------------------------|-----------------------------------------------------------------|---------------------------------------------------------------------------------------------------------------------------------------------------------------------------------------------|-------------------------|
| $Q$       | Eqm. between closed vs open conformation of SFK       | 200 - 500<br>or<br>0                                            | Inferred from activity of fully active SFK relative to activity of fully inhibited SFK<br>For mutant or C-term. dephos. SFK                                                                 | (1-4)                   |
| $K_3$     | Association constant for binding of $E$ to $R^*$      | $(0.1 - 1) \times 10^7$<br>$M^{-1}$                             | Association constant for binding of SFK SH2 domain to phosphopeptide                                                                                                                        | (5, 6)                  |
| $E_t$     | Total concentration of SFK in open conformation       | $\sim 0.12 \times 10^{-7}$<br>$M$<br><br>$1.6 \times 10^{-7} M$ | Biosynthetic labeling: $5 \times 10^5$ viral Src molecules/cell and 50x lower level of Src relative to viral Src<br><br>Quantitative Western blot: $5 \times 10^4$ Fyn molecules per T cell | (7, 8)<br><br>(9)       |
| $R_t$     | Total concentration of R                              | $1.3 \times 10^{-7} M$<br><br>$(0.6 - 1.2) \times 10^{-7} M$    | Quantitative flow cytometry: $3 \times 10^5$ Fc receptors per RBL cell<br><br>$(2 - 4) \times 10^4$ TCRs per T cell                                                                         | (10)<br><br>(11)        |
| $k_{cat}$ | Turnover number                                       | $40 \text{ min}^{-1}$<br><br>$40 - 200 \text{ min}^{-1}$        | Phosphorylation of peptide substrate by Hck, in presence of activator<br><br>Phosphorylation of peptide substrates by activated Src                                                         | (1, 12)<br><br>(13, 14) |
| $K_M$     | Michaelis constant, $K_M$ for $E$                     | $10^{-4} - 10^{-3} M$                                           | Phosphorylation assays                                                                                                                                                                      | (1, 13-15)              |
| $k_1$     | $R$ phos. by $E$                                      | $(4 - 200) \times 10^4$<br>$M^{-1} \text{ min}^{-1}$            | $k_{cat}/K_M$                                                                                                                                                                               |                         |
| $k_4$     | $R$ phos. in $RR^*$ - $E$ complex                     | $\sim k_{cat}$                                                  | Receptor tails occupy a hemisphere of radius $\sim 3 \text{ nm}$ ( $5 \times 10^{-23} \text{ L}$ ), so receptor and kinase are both $\sim 10 \text{ mM}$ , well above $K_M$ .               | (10)                    |
| $\sigma$  | Receptor trans-phos. effect,<br>$\frac{k_4 K_3}{k_1}$ | 20-5000                                                         | Derived parameter (Appendix 2)                                                                                                                                                              |                         |

|        |                                                                 |                                        |                                                                                                                                                                                                                                                                                                                                                                     |                                  |
|--------|-----------------------------------------------------------------|----------------------------------------|---------------------------------------------------------------------------------------------------------------------------------------------------------------------------------------------------------------------------------------------------------------------------------------------------------------------------------------------------------------------|----------------------------------|
| $\phi$ | Increase in SFK activity due to activation loop phosphorylation | $\sim 4 - 20$                          | (2.5 - 3)-fold lower kinase activity of autophosphorylation site mutant of Src or Lck, compared with wildtype Src or Lck, corrected for 20-30% autophosphorylation stoichiometry.<br>4-fold higher kinase activity of fully dephosphorylated Hck after autophosphorylation<br>20-times higher activity of C-terminally phosphorylated Hck after autophosphorylation | (8, 16-18)<br>(1)<br>(1, 12, 19) |
| $q_1$  | Autophos. of SFK                                                | $10^6 \text{ M}^{-1} \text{ min}^{-1}$ | $\sim 10$ min lag time for autophosphorylation of a solution of $10^{-7}$ M dephosphorylated Src or Hck                                                                                                                                                                                                                                                             | (1, 14)                          |
| $q_3$  | Trans-phos. of SFK in E-R*-R*-E complex                         | $\sim k_{\text{cat}}$                  | Receptor tails occupy a hemisphere of radius $\sim 3$ nm ( $5 \times 10^{-23}$ L), so effective $E_t$ and $R_t$ are both $\sim 10$ mM, well above $K_M$ .                                                                                                                                                                                                           | (10)                             |
| $\xi$  | SFK trans-phos. effect $\frac{q_3 K_3^2 R_t}{q_1}$              | 2 - 800                                | Derived parameter (Appendix 3)                                                                                                                                                                                                                                                                                                                                      |                                  |

General assumptions: RBL cell is sphere of radius 7  $\mu\text{m}$ , volume 1.4 pL (10). Fibroblast cell contains 0.3 ng protein, volume 4.5 pL (8). T cell sphere of radius 5  $\mu\text{m}$ , volume 0.5 pL. Note that nuclear volume may be as much as 50% of cell volume.

<sup>a</sup> REFERENCES for Table 2:

1. Moarefi, I., LaFevre-Bernt, M., Sicheri, F., Huse, M., Lee, C. H., Kuriyan, J., and Miller, W. T. (1997) Activation of the Src-family tyrosine kinase Hck by SH3 domain displacement. *Nature* 385, 650-653.
2. Stover, D. R., Liebetanz, J., and Lydon, N. B. (1994) Cdc2-mediated modulation of pp60c-src activity. *J. Biol. Chem.* 269, 26885-26889.
3. Iba, H., Cross, F. R., Garber, E. A., and Hanafusa, H. (1985) Low level of cellular protein phosphorylation by nontransforming overproduced pp60c-src. *Mol. Cell. Biol.* 5, 1058-1066.
4. Coussens, P. M., Cooper, J. A., Hunter, T., and Shalloway, D. (1985) Restriction of the in vitro and in vivo tyrosine protein kinase activities of pp60<sup>c-src</sup> relative to pp60<sup>v-src</sup>. *Mol. Cell. Biol.* 5, 2753-2763.
5. Bradshaw, J. M., Grucza, R. A., Ladbury, J. E., and Waksman, G. (1998) Probing the "two-pronged plug two-holed socket" model for the mechanism of binding of the Src SH2 domain to phosphotyrosyl peptides: a thermodynamic study. *Biochemistry* 37, 9083-9090.

6. Ladbury, J. E., Lemmon, M. A., Zhou, M., Green, J., Botfield, M. C., and Schlessinger, J. (1995) Measurement of the binding of tyrosyl phosphopeptides to SH2 domains: a reappraisal. *Proc. Natl. Acad. Sci. USA* 92, 3199-3203.
7. Collett, M. S., Brugge, J. S., and Erikson, R. L. (1978) Characterization of a normal avian cell protein related to the avian sarcoma virus transforming gene product. *Cell* 15, 1363-1369.
8. Sefton, B. M., Patschinsky, T., Berdot, C., Hunter, T., and Elliott, T. (1982) Phosphorylation and metabolism of the transforming protein of Rous sarcoma virus. *J. Virol.* 41, 813-820.
9. Olszowy, M. W., Leuchtman, P. L., Veillette, A., and Shaw, A. S. (1995) Comparison of p56lck and p59fyn protein expression in thymocyte subsets, peripheral T cells, NK cells, and lymphoid cell lines. *J. Immunol.* 155, 4236-4240.
10. Wofsy, C., Torigoe, C., Kent, U. M., Metzger, H., and Goldstein, B. (1997) Exploiting the difference between intrinsic and extrinsic kinases: implications for regulation of signaling by immunoreceptors. *J. Immunol.* 159, 5984-5992.
11. Cochran, J. R., Cameron, T. O., Stone, J. D., Lubetsky, J. B., and Stern, L. J. (2001) Receptor proximity, not intermolecular orientation, is critical for triggering T-cell activation. *J. Biol. Chem.* 276, 28068-28074.
12. LaFevre-Bernt, M., Sicheri, F., Pico, A., Porter, M., Kuriyan, J., and Miller, W. T. (1998) Intramolecular regulatory interactions in the Src family kinase Hck probed by mutagenesis of a conserved tryptophan residue. *J. Biol. Chem.* 273, 32129-32134.
13. Lydon, N. B., Gay, B., Mett, H., Murray, B., Liebetanz, J., Gutzwiller, A., Piwnica-Worms, H., Roberts, T. M., and McGlynn, E. (1992) Purification and biochemical characterization of non-myristoylated recombinant pp60c-src kinase. *Biochem. J.* 287 ( Pt 3), 985-993.
14. Barker, S. C., Kassel, D. B., Weigl, D., Huang, X., Luther, M. A., and Knight, W. B. (1995) Characterization of pp60c-src tyrosine kinase activities using a continuous assay: autoactivation of the enzyme is an intermolecular autophosphorylation process. *Biochemistry* 34, 14843-14851.
15. Garcia, P., Shoelson, S. E., George, S. T., Hinds, D. A., Goldberg, A. R., and Miller, W. T. (1993) Phosphorylation of synthetic peptides containing Tyr-Met-X-Met motifs by nonreceptor tyrosine kinases in vitro. *J. Biol. Chem.* 268, 25146-25151.
16. Kmiecik, T. E., and Shalloway, D. (1987) Activation and suppression of pp60c-src transforming ability by mutation of its primary sites of tyrosine phosphorylation. *Cell* 49, 65-83.
17. Abraham, N., and Veillette, A. (1990) Activation of p56lck through mutation of a regulatory carboxy-terminal tyrosine requires intact sites of autophosphorylation and myristylation. *Mol. Cell. Biol.* 10, 5197-5206.
18. Caron, L., Abraham, N., Pawson, T., and Veillette, A. (1992) Structural requirements for enhancement of T-cell responsiveness by the lymphocyte-specific tyrosine protein kinase p56lck. *Mol. Cell. Biol.* 12, 2720-2729.
19. Boerner, R. J., Kassel, D. B., Barker, S. C., Ellis, B., DeLacy, P., and Knight, W. B. (1996) Correlation of the phosphorylation states of pp60c-src with tyrosine kinase activity: the intramolecular pY530-SH2 complex retains significant activity if Y419 is phosphorylated. *Biochemistry* 35, 9519-9525.

## Appendix 1: Effect of positive and negative feedback on phosphorylation of monomeric receptor

For the monomeric receptor, phosphorylation by  $E$  creates  $R^*$  according to:

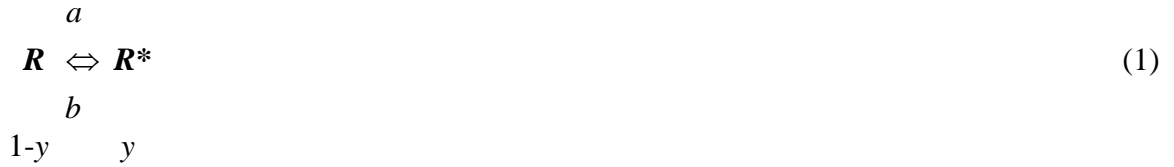

in which  $\mathbf{R}^*$  includes  $R^*$  and  $R^*-E$ . Because only  $R^*$  can be dephosphorylated, and because only unbound  $E$  can phosphorylate  $R$ , the effective rate constants  $a$  and  $b$  are:

$$a = k_1[E] = k_1 E_t x, \quad b = \frac{k_2}{1 + K_3[E]} = \frac{k_2}{1 + K_3 E_t x}, \quad \text{where } x = \frac{[E]}{E_t}. \quad (2)$$

Let  $R_t$  be the total concentration of receptor, and

$$y = \frac{[R^*] + [R^* - E]}{R_t}, \quad (3)$$

$$\begin{aligned} \frac{a}{b} &= \frac{k_1 E_t x}{k_2} (1 + K_3 E_t x) \\ 1 + \frac{a}{b} &= \frac{k_1 E_t x}{k_2} (1 + K_3 E_t x) \end{aligned} \quad (4)$$

$x$  is not known *a priori*, but it depends on  $y$  as follows:

$$x = \frac{[E]}{[E_t] + [E] + [R^* - E]} \quad (5)$$

$$\begin{aligned} &= \frac{1}{Q + 1 + K_3[R^*]} \\ &= \frac{1}{Q + 1 + \frac{K_3 R_t y [R^*]}{[R^*] + [R^* - E]}} \\ &= \frac{1}{Q + 1 + \frac{K_3 R_t y}{1 + K_3 R_t x}} \end{aligned} \quad (6)$$

Solving  $x$  and  $y$  simultaneously gives us  $y$  as a function of all the parameters.

Introducing:

$$\theta_R = \frac{k_1 E_t}{k_2}, \quad (7)$$

then we have, from Eq. (4):

$$y = \frac{\frac{k_1 E_t x}{k_2} (1 + K_3 E_t x)}{1 + \frac{k_1 E_t x}{k_2} (1 + K_3 E_t x)} = \frac{x \theta_R (1 + K_3 E_t x)}{1 + x \theta_R (1 + K_3 E_t x)} \quad (8)$$

The fraction of phosphorylated receptor molecules is  $f_R = y$ , so:

$$f_R = \frac{x \theta_R (1 + K_3 E_t x)}{1 + x \theta_R (1 + K_3 E_t x)}, \quad (9)$$

and rearranging:

$$\theta_R = \frac{f_R}{x(1 - f_R)(1 + K_3 E_t x)}. \quad (10)$$

And from Eq. (6):

$$x = \frac{1}{1 + Q + \frac{K_3 R_t y}{1 + K_3 R_t x}} = \frac{1 + K_3 R_t x}{(1 + K_3 R_t x)(1 + Q) + K_3 R_t f_R}$$

$$x K_3 R_t f_R = 1 + K_3 R_t x - x(1 + K_3 R_t x)(1 + Q)$$

$$f_R = \frac{1 + K_3 R_t x - x(1 + Q + K_3 R_t x(1 + Q))}{x K_3 R_t}$$

Introducing:

$$R_t' = \frac{R_t}{1 + Q}, \quad z = x(1 + Q), \quad (11)$$

$$f_R = \frac{1 + K_3 R_t' z - z - K_3 R_t' z^2}{K_3 R_t' z} = \frac{(1 - z)(1 + K_3 R_t' z)}{K_3 R_t' z} \quad (12)$$

Hence, given  $z$ , we can compute  $f_R$  from Eq. (12), and with  $z = x(1 + Q)$  and  $f_R$  we can compute

$\theta_R$  from Eq. (10). Thus we have  $\theta_R$  and  $f_R$  as functions of  $z$ . These were used to plot the graphs

in Fig. 2b and for Spreadsheet 1.

Note that if  $Q = 0$ , Eq. (12) becomes:

$$f_R = \frac{(1 - x)(1 + K_3 R_t x)}{K_3 R_t x}. \quad (13)$$

Also, regardless of  $Q$ , if  $K_3 E_t \ll 0$ , then Eq. (10) gives  $\theta_R = \frac{f_R}{x(1 - f_R)}$  and  $x \approx 1$ . Hence,

$$f_R = \frac{x \theta_R}{1 + x \theta_R} \approx \frac{\theta_R}{1 + \theta_R}. \quad (14)$$

This is the canonical situation in the absence of feedback, if  $E$  does not bind  $R^*$ .

## Appendix 2: Trans-phosphorylation of receptor dimers, allowing for feedback

For receptor dimers, we can group the rapid association-dissociation reactions and link them by phosphorylation-dephosphorylation reactions, as shown in the Figure (below). The rate constants need to be modified, as in Appendix 1, to give apparent rate constants that allow for reduced concentrations of reactants:-

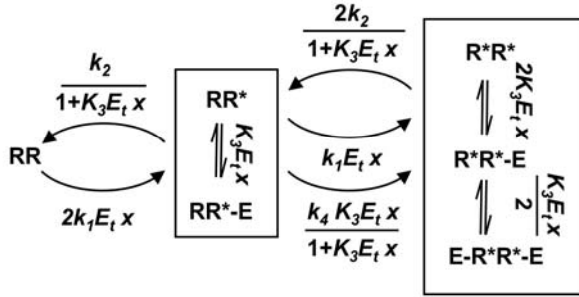

where  $x$ , the fraction of the total enzyme in the free form, will be determined below.

Re-writing:

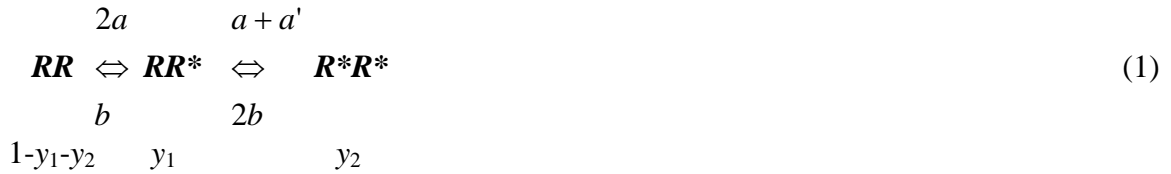

in which  $\mathbf{RR}^*$  and  $\mathbf{R}^*\mathbf{R}^*$  include the respective dimers with associated  $E$ . Then, from the figure:

$$a = k_1 E_t x, \quad b = \frac{k_2}{1 + K_3 E_t x}, \quad a' = \frac{k_4 K_3 E_t x}{1 + K_3 E_t x}, \quad \text{where } x = \frac{[E]}{E_t}. \quad (2)$$

Let  $R_t$  be the total concentration of dimers, and

$$y_1 = \frac{[\mathbf{RR}^*] + [\mathbf{RR}^* - E]}{R_t}, \quad y_2 = \frac{[\mathbf{R}^*\mathbf{R}^*] + [\mathbf{R}^*\mathbf{R}^* - E] + [E - \mathbf{R}^*\mathbf{R}^* - E]}{R_t} \quad (3)$$

then

$$y_1 = \frac{\frac{2a}{b}}{1 + \frac{2a}{b} + \frac{a(a+a')}{b^2}} \quad (4)$$

$$= \frac{\frac{2k_1 E_t x}{k_2} (1 + K_3 E_t x)}{1 + \frac{2k_1 E_t x}{k_2} (1 + K_3 E_t x) + \frac{2k_1 (E_t x)^2}{2k_2^2} (1 + K_3 E_t x) (k_4 K_3 + k_1 + k_1 K_3 E_t x)} \quad (5)$$

$$y_2 = \frac{\frac{a(a+a')}{b^2}}{1 + \frac{2a}{b} + \frac{a(a+a')}{b^2}} \quad (6)$$

$$= \frac{\frac{2k_1(E_t x)^2}{2k_2^2} (1 + K_3 E_t x)(k_4 K_3 + k_1 + k_1 K_3 E_t x)}{1 + \frac{2k_1 E_t x}{k_2} (1 + K_3 E_t x) + \frac{2k_1 (E_t x)^2}{2k_2^2} (1 + K_3 E_t x)(k_4 K_3 + k_1 + k_1 K_3 E_t x)} \quad (7)$$

$x$  in the scheme is not known *a priori*, but it depends on  $y_1$  and  $y_2$ , as follows:

$$x = \frac{[E]}{[E^\dagger] + [E] + [RR^* - E] + [R^* R^* - E] + 2[E - R^* R^* - E]}$$

$$= \frac{1}{Q + 1 + K_3[RR^*] + 2K_3[R^* R^*] + 2K_3^2 E_t x[R^* R^*]}$$

Introducing  $y_1 R_t$  and  $y_2 R_t$ :

$$x = \frac{1}{Q + 1 + \frac{K_3 R_t y_1 [RR^*]}{[RR^*] + [RR^* - E]} + \frac{2K_3 (1 + K_3 E_t x) R_t y_2 [R^* R^*]}{[R^* R^*] + [R^* R^* - E] + [E - R^* R^* - E]}}$$

Now,  $\frac{[RR^*] + [RR^* - E]}{[RR^*]} = 1 + K_3 R_t x$ , and

$$\frac{[R^* R^*] + [R^* R^* - E] + [E - R^* R^* - E]}{[R^* R^*]} = (1 + K_3 R_t x)^2, \text{ so}$$

$$x = \frac{1}{Q + 1 + \frac{K_3 R_t y_1}{1 + K_3 R_t x} + \frac{2K_3 R_t y_2}{1 + K_3 R_t x}}$$

$$= \frac{1}{Q + 1 + \frac{K_3 R_t}{1 + K_3 R_t x} (y_1 + 2y_2)} \quad (8)$$

Solving for  $x$ ,  $y_1$  and  $y_2$  simultaneously gives us what we want.

Introducing:

$$\sigma = \frac{k_4 K_3}{k_1}, \quad E_t' = \frac{E_t}{1+Q}, \quad R_t' = \frac{R_t}{1+Q}, \quad \theta' = \frac{\theta_R}{(1+Q)} = \frac{k_1 E_t}{k_2 (1+Q)} = \frac{k_1 E_t'}{k_2}, \quad z = x(1+Q), \quad (9)$$

then we have  $E_t x = E_t' z$ , and:

$$y_1 = \frac{2z\theta'(1 + K_3 E_t' z)}{1 + 2z\theta'(1 + K_3 E_t' z) + z^2\theta'^2 (1 + K_3 E_t' z)(\sigma + 1 + K_3 E_t' z)} \quad (10)$$



$$y_2 = \frac{z^2 \theta'^2 (1 + K_3 E_t' z)(\sigma + 1 + K_3 E_t' z)}{1 + 2z\theta'(1 + K_3 E_t' z) + z^2 \theta'^2 (1 + K_3 E_t' z)(\sigma + 1 + K_3 E_t' z)} \quad (11)$$

$$z = \frac{1}{1 + \frac{K_3 R_t' (y_1 + 2y_2)}{1 + K_3 R_t' z}} \quad (12)$$

The fraction of phosphorylated receptor molecules is  $f_R = \frac{y_1 + 2y_2}{2}$ .

Combining Eqs. (10) and (11), we have:

$$f_R = \frac{z\theta'(1 + K_3 E_t' z) + z^2 \theta'^2 (1 + K_3 E_t' z)(\sigma + 1 + K_3 E_t' z)}{1 + 2z\theta'(1 + K_3 E_t' z) + z^2 \theta'^2 (1 + K_3 E_t' z)(\sigma + 1 + K_3 E_t' z)}, \quad (13)$$

and Eq. (12) can be written as

$$z = \frac{1 + K_3 R_t' z}{1 + K_3 R_t' z + 2K_3 R_t' f_R}. \quad (14)$$

We can solve  $\theta'$  as a function of  $f_R$  and  $z$  from Eq. (13):

$$A\theta'^2 + B\theta' + C = 0, \quad (15)$$

that is,

$$\theta' = \frac{-B + \sqrt{B^2 - 4AC}}{2A}, \quad (16)$$

in which

$$A = z^2 (1 + K_3 E_t' z)(\sigma + 1 + K_3 E_t' z)(1 - f_R)$$

$$B = z(1 + K_3 E_t' z)(1 - 2f_R)$$

$$C = -f_R$$

We can also solve  $f_R$  as a function of  $z$  from Eq. (14)

$$f_R = \frac{(1 - z)(1 + K_3 R_t' z)}{2zK_3 R_t'}. \quad (17)$$

Hence, given  $z$ , we can compute  $f_R$  from Eq. (17), and with  $z$  and  $f_R$  we can compute

$\theta_R = \theta'(1 + Q)$  from Eq. (16). Thus we have  $\theta_R$  and  $f_R$  as functions of  $z$ . These were used to plot

the graphs in Fig. 3 and S1 and for Spreadsheet 2.

Note that if  $k_4 = 0$ ,  $\sigma = 0$ , Eq. (13) becomes:

$$f_R = \frac{z\theta'(1 + K_3 E_t' z) + z^2 \theta'^2 (1 + K_3 E_t' z)^2}{1 + 2z\theta'(1 + K_3 E_t' z) + z^2 \theta'^2 (1 + K_3 E_t' z)^2}$$

$$\begin{aligned}
&= \frac{(1+\zeta)\zeta}{(1+\zeta)^2} \\
&= \frac{\zeta}{1+\zeta}, \text{ where } \zeta = z\theta'(1+K_3E_t'z) = x\theta_R(1+K_3E_t'x). \tag{18}
\end{aligned}$$

In other words, if there is no receptor trans-phosphorylation ( $k_4 = 0$ ), then  $Q$  does not enter into the equation. This curve is the same as the monomer curve in Appendix 1.

If, in addition, we ignore binding of  $E$  to  $R^*$ , then  $x = 1$  and

$$f_R = \frac{\zeta}{1+\zeta}, \text{ where } \zeta = \theta_R(1+K_3E_t), \text{ and if } K_3E_t \ll 1, f_R \approx \frac{\theta_R}{1+\theta_R}, \tag{19}$$

as expected (Appendix 1, Eq. 14).

### Appendix 3: The effect of SFK trans-phosphorylation, independent of receptor trans-phosphorylation

The additional reactions in which open conformation SFK,  $E$ , is phosphorylated to  $E^*$  are shown in Fig. 4. We assume complete independence of phosphorylation/dephosphorylation of  $E$ , phosphorylation/dephosphorylation of  $R$ , and SH2-mediated binding. We do not include the effects of  $E$  binding to  $R^*$  on either the reduced rate of  $R$  phosphorylation or on protecting  $R^*$  from phosphatases (Appendix 1) or the receptor trans-phosphorylation (Appendix 2).

For receptor monomers, the reaction for phosphorylating  $E$  in solution or in complexes with  $R^*$  is:

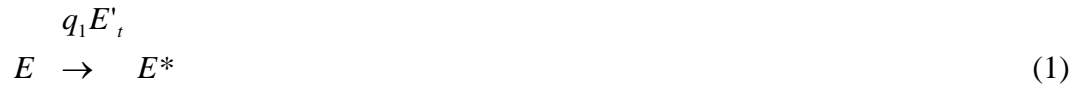

where  $E'_t$  is the total of open-conformation SFK,  $E'_t = E + E^* = \frac{E_t}{1+Q}$ .

Since  $E'_t \ll K_M$  (Table 2),  $q_1$  is approximately the ratio of the Michaelis-Menten parameters for phosphorylation of  $E$  (or various  $R^*-E$  complexes) by  $E$ . So,  $q_1 \sim k_{cat}/K_M$ .

For receptor dimers, which can form  $R^*R^*-E$  or  $R^*R^*-E^*$  complexes, there are two parallel reactions to phosphorylate an  $E$ . One  $E$  can directly phosphorylate the other:

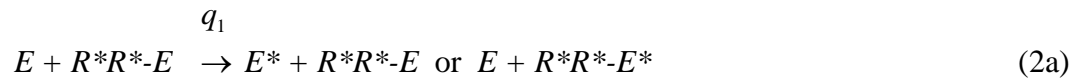

or,  $R^*R^*$  can act as a scaffold:

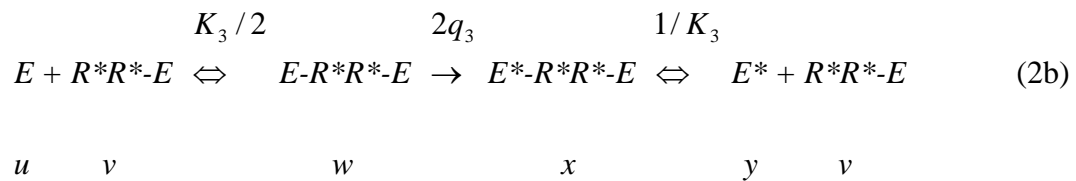

Then  $K_3 = \frac{2w}{uv} = \frac{x}{yv}$ , so  $\frac{y}{x+y} = \frac{1}{1+K_3v}$  and  $w = \frac{K_3uv}{2}$ . The rate of production of  $E^*$  by this pathway is

$$\frac{dy}{dt} = \frac{1}{1+K_3v} \frac{d(x+y)}{dt} = \frac{2q_3w}{1+K_3v} = \frac{q_3K_3v}{1+K_3v}u$$

The concentration of doubly phosphorylated receptor dimers,  $[R^*R^*]$ , is  $R f_R^2$ , and

$v = 2[R^*R^*]E'_t K_3$  (Fig. 2h), so

$$v = 2R_t f_R^2 E'_t K_3, \text{ and}$$

$$\frac{dy}{dt} = \frac{2q_3K_3^2R_t f_R^2 E'_t}{1+2K_3^2R_t f_R^2 E'_t}u \approx q_3K_3^2R_t f_R^2 E'_t u, \text{ provided that } K_3^2R_t f_R^2 E'_t \ll 1.$$

If we set  $\xi = \frac{q_3K_3^2R_t}{q_1}$ , then:

$$\frac{dy}{dt} \approx q_1 \xi E'_t f_R^2 u,$$

and the effective rate constant  $\frac{1}{u} \cdot \frac{dy}{dt}$  for the second route to  $E^*$  is  $q_1 \xi E'_t f_R^2$ .

Combining reactions (2a) and (2b):

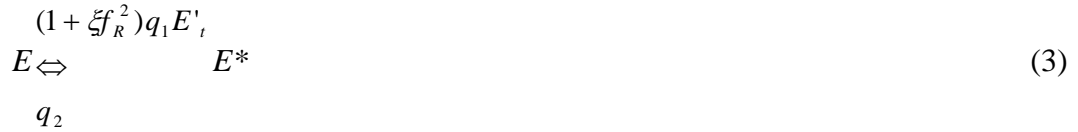

Define  $f_E$  as the fraction of open-conformation  $E$ , bound and unbound, in the  $E^*$  state:

$f_E = \frac{E^*}{E'_t} = \frac{E^*}{E'_t} (1 + Q)$ . Then:

$$\frac{1}{f_E} = 1 + \frac{E}{E^*} = 1 + \frac{q_2}{(1 + \xi f_R^2) q_1 E'_t}, \text{ so } f_E = \frac{(1 + \xi f_R^2) q_1 E'_t}{(1 + \xi f_R^2) q_1 E'_t + q_2}.$$

If we define the control parameter for SFK phosphorylation,

$$\theta_E = \frac{q_1 E'_t}{q_2} = \frac{q_1 E'_t}{q_2 (1 + Q)}, \quad (4)$$

then

$$f_E = \frac{(1 + \xi f_R^2) \theta_E}{(1 + \xi f_R^2) \theta_E + 1} \quad (5)$$

Now we need to take account of the increased SFK activity in calculating the level of receptor phosphorylation. The activity of SFK driving receptor phosphorylation is increased from  $k_1 E'_t$  to  $k_1(1 - f_E + \phi f_E) E'_t$  and the control parameter  $\theta_R = \frac{k_1 E'_t}{k_2}$  for receptor phosphorylation

needs to be modified to  $\hat{\theta}_R = \theta_R(1 - f_E + \phi f_E)$  for the increased SFK activity. The new fraction of phosphorylated receptor monomers is:

$$f_R = \frac{\hat{\theta}_R}{1 + \hat{\theta}_R} = \frac{\theta_R(1 - f_E + \phi f_E)}{1 + \theta_R(1 - f_E + \phi f_E)} \quad (6)$$

Combining Eqs. (5) and (6) and eliminating  $f_E$ , we have:

$$\theta_R = \frac{f_R [1 + \theta_E(1 + \xi f_R^2)]}{(1 - f_R) [1 + \phi \theta_E(1 + \xi f_R^2)]} \quad (7)$$

This relationship between  $f_R$  and  $\theta_R$  for various  $\xi$ ,  $\theta_E$ , and  $\phi$  (Eq. 7) was used to plot Fig. 4c and d (black lines). Eq. (5) was used to plot  $f_E$  against  $\theta_R$  for various  $\xi$ ,  $\theta_E$ , and  $\phi$  in Fig. 4b (blue lines). These calculations are in Spreadsheet 3.

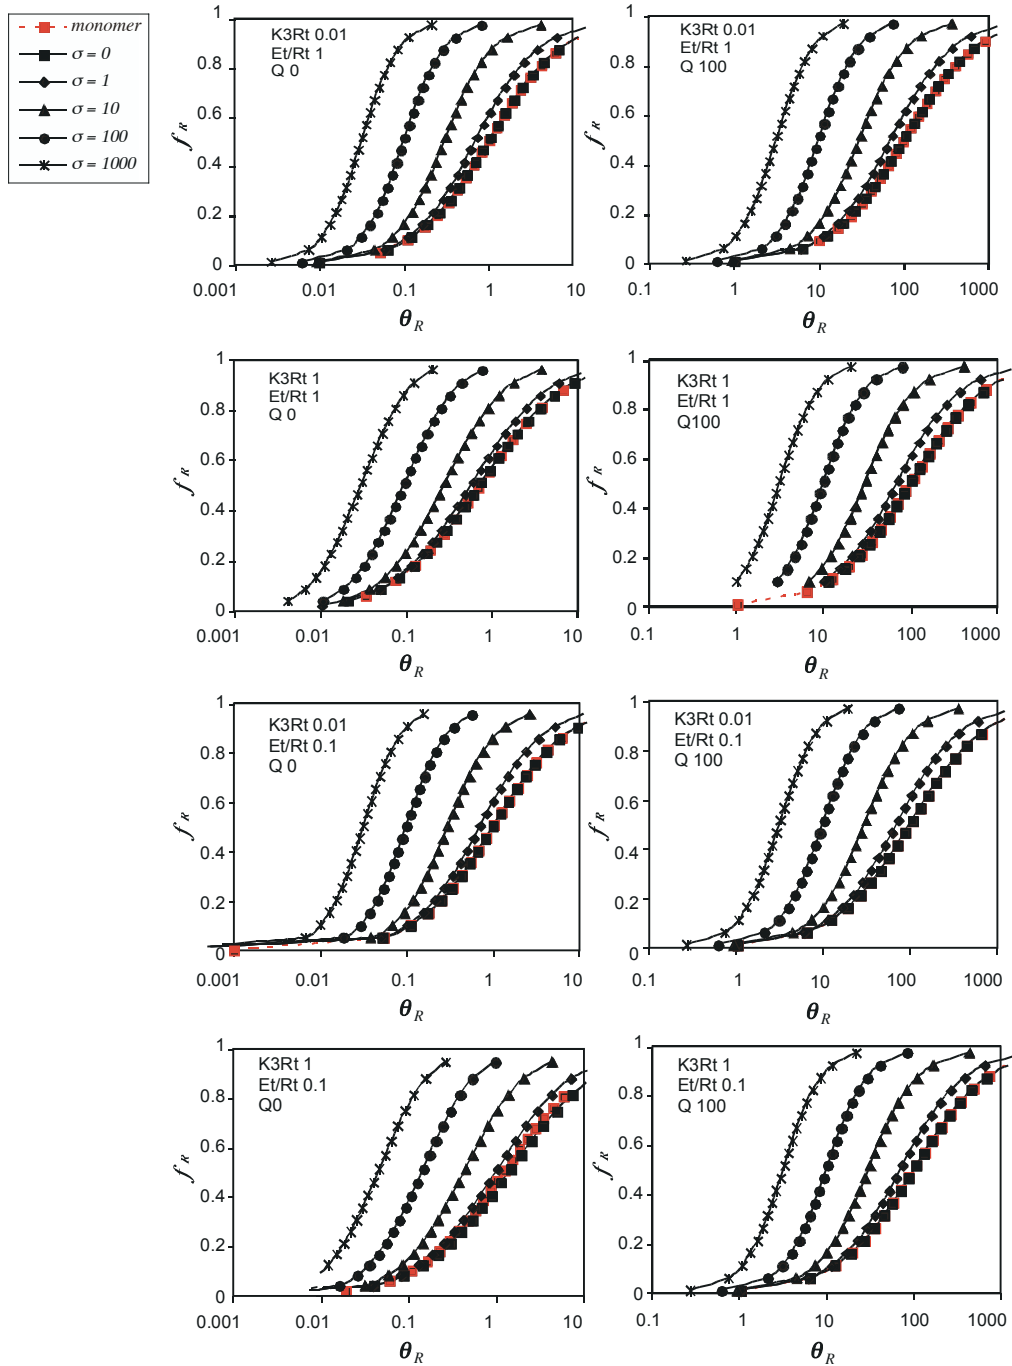

Fig. S1. Effect of  $E$  binding to  $R^*$  on phosphorylation of monomeric  $R$  and of dimeric  $RR$  on receptor transphosphorylation.

The levels of phosphorylation ( $f_R$ ) of a receptor dimer (black lines) and monomer (red) are plotted for a variety of values of  $\sigma$ ,  $K_3R_t$ ,  $E_t/R_t$ ,  $Q$  and  $\theta_R$  that may be found in nature (see Table 2). For each set of conditions, there are values of  $\theta_R$  for which the receptor dimer is phosphorylated at a greater than  $>2$ -fold level compared with receptor monomer. Note that curves on the left are for SFK that is completely in the active conformation ( $Q = 0$ ), while curves on the right are for SFK that is 99% in the inactive conformation ( $Q = 100$ ), and that the values of  $\theta_R$  on the abscissa are different for the left and right graphs.

Calculations of monomer were performed according to Appendix 1 and dimer according to Appendix 2. Note that  $\sigma = 0$  for the dimer is equivalent to the monomer result, as expected.

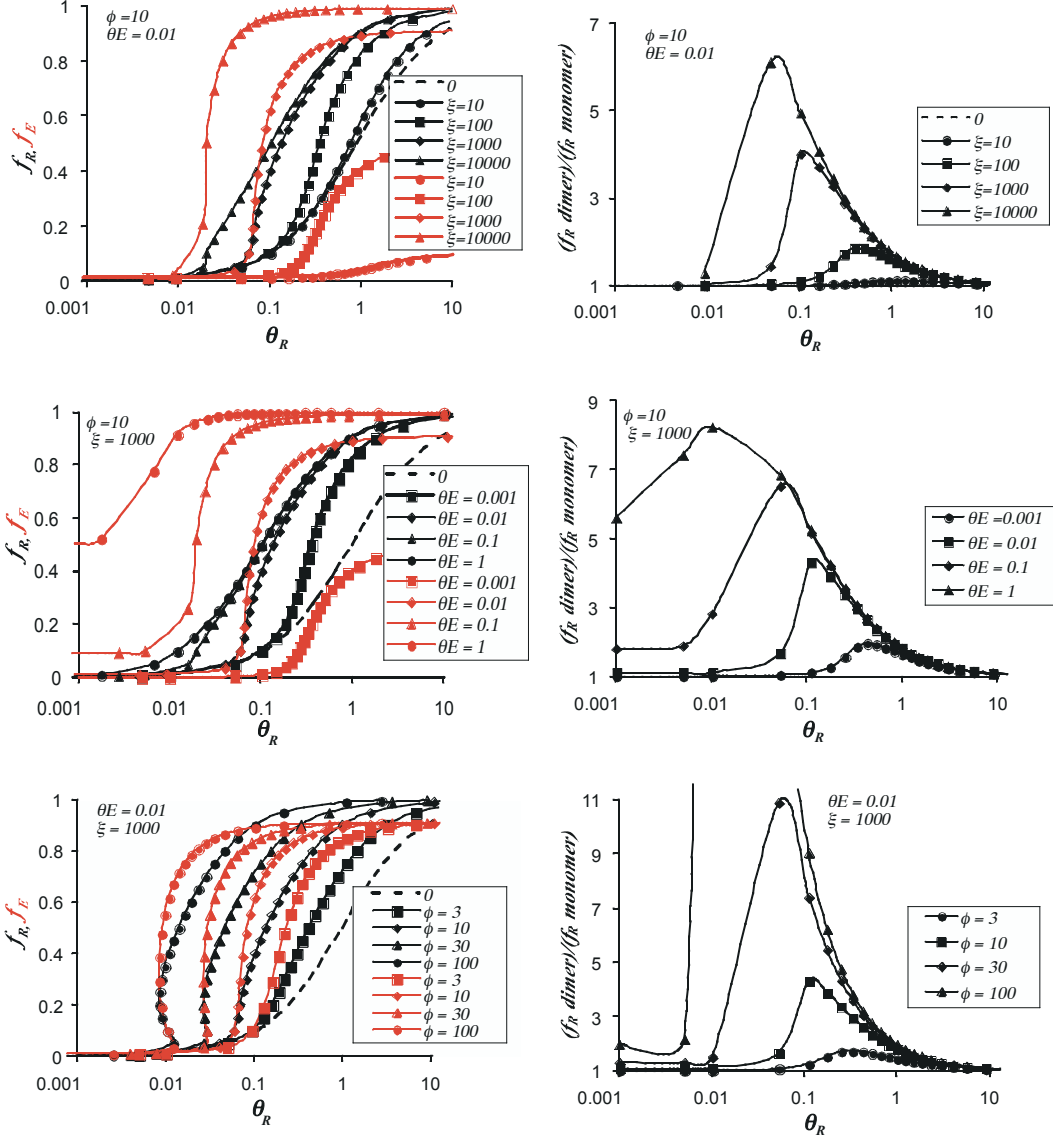

Fig. S2. Effect of varying  $\xi$ ,  $\phi$ , and  $\theta_E$  on  $f_E$  and  $f_R$  (left panels) and the fold-stimulation in  $f_R$  due to dimerization (right panels).

Calculations according to Appendix 3. Note the > 10-fold stimulation of  $f_E$  and  $f_R$  that can occur at low  $\theta_E$  and high  $\xi$ .
